# Supplementary material for: Acute leucocyte, muscle damage, and stress marker responses to high-intensity functional training
Source: PubMed Central journal article supplement (PMC7714345; doi:10.1371/journal.pone.0243276), 2020-12-03
Supplement: pone.0243276.s001.pdf [file pone.0243276.s001.pdf]

**Table 5. - Pre- to post-changes in outcomes of leucocytes, neutrophils, lymphocytes, monocytes, creatine kinase, lactate, cortisol and area under the curve of cortisol following a single ‘Cindy’ workout session (M ± SEM [SD])**

| Variables                                | Group | Pre-ex                       | Post-ex                             | Post-30min                        | Post-24h                           |
|------------------------------------------|-------|------------------------------|-------------------------------------|-----------------------------------|------------------------------------|
| Total WBC (x10 <sup>3</sup> /μL)         | EXP   | 7.1 ± 0.4 [1.3]              | 12.6 ± 0.7 [2.5] <sup>*‡</sup>      | 7.2 ± 0.5 [1.7]                   | 7.4 ± 0.4 [1.4]                    |
|                                          | NOV   | 6.5 ± 0.3 [0.9]              | 10.7 ± 0.5 [1.6] <sup>*‡</sup>      | 6.5 ± 0.4 [1.3]                   | 6.6 ± 0.4 [1.2]                    |
|                                          | All   | 6.8 ± 0.2 [1.1]              | 11.8 ± 0.5 [2.3] <sup>*‡</sup>      | 6.9 ± 0.3 [1.6]                   | 7.1 ± 0.3 [1.4]                    |
| Neutrophils (x10 <sup>3</sup> /μL)       | EXP   | 3.3 ± 0.2 [0.7]              | 4.6 ± 0.4 [1.5] <sup>*‡</sup>       | 4.3 ± 0.3 [1.1] <sup>*</sup>      | 3.5 ± 0.4 [1.3]                    |
|                                          | NOV   | 3.2 ± 0.2 [0.6]              | 4.4 ± 0.3 [0.9] <sup>*‡</sup>       | 3.5 ± 0.3 [1.0] <sup>*\$</sup>    | 3.3 ± 0.3 [1.0]                    |
|                                          | All   | 3.3 ± 0.1 [0.7]              | 4.5 ± 0.3 [1.3] <sup>*</sup>        | 3.9 ± 0.2 [1.1] <sup>*</sup>      | 3.4 ± 0.2 [1.2]                    |
| Lymphocytes (x10 <sup>3</sup> /μL)       | EXP   | 3.0 ± 0.3 [0.9] <sup>α</sup> | 6.6 ± 0.4 [1.5] <sup>*‡#</sup>      | 2.2 ± 0.2 [0.8]                   | 3.0 ± 0.3 [0.9] <sup>α</sup>       |
|                                          | NOV   | 2.5 ± 0.1 [0.5] <sup>α</sup> | 5.0 ± 0.3 [0.9] <sup>*‡</sup>       | 2.2 ± 0.1 [0.3]                   | 2.4 ± 0.1 [0.4] <sup>α</sup>       |
|                                          | All   | 2.8 ± 0.2 [0.8] <sup>α</sup> | 5.9 ± 0.3 [1.5] <sup>*‡</sup>       | 2.2 ± 0.1 [0.6]                   | 2.7 ± 0.2 [0.8] <sup>α</sup>       |
| Monocytes (x10 <sup>3</sup> /μL)         | EXP   | 0,485 ± 0.026 [0,093]        | 0,956 ± 0.047 [0,168] <sup>*‡</sup> | 0,468 ± 0.027 [0,096]             | 0,589 ± 0.031 [0,112] <sup>*</sup> |
|                                          | NOV   | 0,416 ± 0.059 [0,186]        | 0,828 ± 0.114 [0,361] <sup>*‡</sup> | 0,522 ± 0.048 [0,153]             | 0,525 ± 0.049 [0,155] <sup>*</sup> |
|                                          | All   | 0,455 ± 0.029 [0,142]        | 0,900 ± 0.056 [0,270] <sup>*‡</sup> | 0,492 ± 0.026 [0,124]             | 0,561 ± 0.028 [0,133] <sup>*</sup> |
| CK (U.L-1)                               | EXP   | 167.8 ± 40.2 [114.8]         | 217.5 ± 47.1 [169.7] <sup>*</sup>   | 207.8 ± 43.1 [155.4] <sup>*</sup> | 273.8 ± 50.4 [181.9] <sup>*</sup>  |
|                                          | NOV   | 184.1 ± 37.4 [118.4]         | 238.6 ± 49.7 [157.1] <sup>*</sup>   | 224.9 ± 44.1 [139.6] <sup>*</sup> | 279.9 ± 57.9 [183.0] <sup>*</sup>  |
|                                          | All   | 174.9 ± 27.4 [131.3]         | 226.7 ± 33.6 [161.0] <sup>*</sup>   | 215.3 ± 30.4 [145.6] <sup>*</sup> | 276.5 ± 37.2 [178.2] <sup>*</sup>  |
| Lactate (mmol.l <sup>-1</sup> )          | EXP   | 2.0 ± 0.2 [0.6]              | 14.3 ± 0.7 [2.5] <sup>*α</sup>      | 5.0 ± 0.3 [1.1] <sup>*</sup>      | -                                  |
|                                          | NOV   | 1.8 ± 0.4 [1.2]              | 12.4 ± 1.6 [5.1] <sup>*α</sup>      | 4.3 ± 0.6 [1.9] <sup>*</sup>      | -                                  |
|                                          | All   | 1.9 ± 0.2 [0.9]              | 13.5 ± 0.8 [3.9] <sup>*α</sup>      | 4.7 ± 0.3 [1.5] <sup>*</sup>      | -                                  |
| Cortisol (μg/dl)                         | EXP   | 15.4 ± 0.7 [2.4]             | 19.6 ± 0.9 [3.3] <sup>&amp;#</sup>  | 19.9 ± 1.1 [4.0] <sup>*#</sup>    | -                                  |
|                                          | NOV   | 13.4 ± 1.2 [3.7]             | 13.9 ± 1.1 [3.6]                    | 15.9 ± 1.4 [4.5] <sup>*</sup>     | -                                  |
|                                          | All   | 14.6 ± 0.7 [3.0]             | 17.2 ± 0.9 [4.3] <sup>&amp;</sup>   | 18.2 ± 1.0 [4.4] <sup>*</sup>     | -                                  |
| Area under the curve of Cortisol (μg/dl) | EXP   | -                            | -                                   | 943.9 ± 44.1 [159.2] <sup>#</sup> | -                                  |
|                                          | NOV   | -                            | -                                   | 720.9 ± 54.1 [171.2]              | -                                  |

\*Significantly different from pre-ex ( $p < 0.05$ );

‡Significantly greater than post-30min and post-24h ( $p < 0.05$ );

\*Significantly different between EXP and NOV group ( $p < 0.05$ );

§Significantly lower than post-ex only for NOV ( $p < 0.05$ );

<sup>a</sup>Significantly greater than post-30min ( $p < 0.05$ ).

<sup>&</sup>Significantly greater than pre-ex only for ALL and EXP ( $p < 0.05$ ).
